# Supplementary material for: Self-report fatigue questionnaires in multiple sclerosis, Parkinson’s disease and stroke: a systematic review of measurement properties
Source: Springer Nature journal article supplement (doi:10.1007/s11136-011-0009-2), 2011-10-19
Supplement: MOESM1 [file 273648]

Supplementary file 1

Self-report fatigue questionnaires in multiple sclerosis, Parkinson’s disease and stroke: a systematic review of measurement properties

Quality of Life Research

Roy G. Elbers*, Marc B. Rietberg, Erwin E.H. van Wegen, John Verhoef, Sharon F. Kramer, Caroline B. Terwee, Gert Kwakkel.

*University of Applied Sciences Leiden, Department of Physiotherapy, Zernikedreef 11, PO Box 382, 2300 AJ Leiden, The Netherlands.

Phone: +31 71 5188299

Fax: +31 71 5188801

[elbers.r@hsleiden.nl](mailto:elbers.r@hsleiden.nl)

Search strategy

MEDLINE searched through PubMed

Block 1

instrumentation[sh] OR methods[sh] OR validation studies[pt] OR comparative study[pt] OR "psychometrics"[Mesh] OR psychometr*[tiab] OR clinimetr*[tw] OR clinometr*[tw] OR "outcome assessment (health care)"[Mesh] OR outcome assessment[tiab] OR

outcome measure*[tw] OR "observer variation"[Mesh] OR observer variation[tiab] OR

"health status indicators"[Mesh] OR "reproducibility of results"[Mesh] OR reproducib*[tiab] OR "discriminant analysis"[Mesh] OR reliab*[tiab] OR unreliab*[tiab] OR valid*[tiab] OR coefficient[tiab] OR homogeneity[tiab] OR homogeneous[tiab] OR "internal consistency"[tiab] OR (cronbach*[tiab] AND (alpha[tiab] OR alphas[tiab])) OR (item[tiab] AND (correlation*[tiab] OR selection*[tiab] OR reduction*[tiab])) OR agreement[tiab] OR precision[tiab] OR imprecision[tiab] OR "precise values"[tiab] OR test retest[tiab] OR (test[tiab] AND retest[tiab])

OR (reliab*[tiab] AND (test[tiab] OR retest[tiab])) OR stability[tiab] OR interrater[tiab] OR

inter-rater[tiab] OR intrarater[tiab] OR intra-rater[tiab] OR intertester[tiab] OR inter-tester[tiab] OR intratester[tiab] OR intra-tester[tiab] OR interobserver[tiab] OR inter-observer[tiab] OR

intraobserver[tiab] OR intraobserver[tiab] OR intertechnician[tiab] OR inter-technician[tiab] OR intratechnician[tiab] OR intra-technician[tiab] OR interexaminer[tiab] OR inter-examiner[tiab] OR intraexaminer[tiab] OR intra-examiner[tiab] OR interassay[tiab] OR inter-assay[tiab] OR intraassay[tiab] OR intra-assay[tiab] OR interindividual[tiab] OR inter-individual[tiab] OR

intraindividual[tiab] OR intra-individual[tiab] OR interparticipant[tiab] OR inter-participant[tiab] OR intraparticipant[tiab] OR intra-participant[tiab] OR kappa[tiab] OR kappas[tiab] OR kappas[tiab] OR repeatab*[tiab] OR ((replicab*[tiab] OR repeated[tiab]) AND (measure[tiab] OR measures[tiab] OR findings[tiab] OR result[tiab] OR results[tiab] OR test[tiab] OR tests[tiab])) OR generaliza*[tiab] OR generalisa*[tiab] OR concordance[tiab] OR (intraclass[tiab] AND correlation*[tiab]) OR discriminative[tiab] OR "known group"[tiab] OR factor analysis[tiab] OR factor analyses[tiab] OR dimension*[tiab] OR subscale*[tiab] OR (multitrait[tiab] AND scaling[tiab] AND (analysis[tiab] OR analyses[tiab])) OR item discriminant[tiab] OR interscale correlation*[tiab] OR error[tiab] OR errors[tiab] OR "individual variability"[tiab] OR (variability[tiab] AND (analysis[tiab] OR values[tiab])) OR (uncertainty[tiab] AND (measurement[tiab] OR measuring[tiab])) OR "standard error of measurement"[tiab] OR sensitiv*[tiab] OR responsive*[tiab] OR ((minimal[tiab] OR minimally[tiab] OR clinical[tiab] OR clinically[tiab]) AND (important[tiab] OR significant[tiab] OR detectable[tiab]) AND (change[tiab] OR difference[tiab])) OR (small*[tiab] AND (real[tiab] OR detectable[tiab]) AND (change[tiab] OR difference[tiab])) OR meaningful change[tiab] OR "ceiling effect"[tiab] OR "floor effect"[tiab] OR "item response model"[tiab] OR IRT[tiab] OR rasch[tiab] OR

"differential item functioning"[tiab] OR DIF[tiab] OR "computer adaptive testing"[tiab] OR "item bank"[tiab] OR "cross-cultural equivalence"[tiab]

Block 2

"fatigue"[Mesh] OR "fatigue syndrome, chronic"[Mesh] OR fatigue[tiab] OR lassitude[tiab] OR tired*[tiab] OR exhaust*[tiab] OR weariness[tiab] OR weary[tiab]

Block 3

"multiple sclerosis"[Mesh] OR "multiple sclerosis, chronic progressive"[Mesh] OR

"multiple sclerosis, relapsing-remitting"[Mesh] OR "neuromyelitis optica"[Mesh] OR "myelitis, transverse"[Mesh] OR multiple sclerosis[tiab] OR demyelinating diseas*[tiab] OR

myelitis transverse[tiab] OR optic neuritis[tiab] OR neuromyelitis optica[tiab]

Block 4

"parkinsonian disorders"[Mesh] OR "parkinson disease"[Mesh] OR parkinsonian disorders[tiab] OR parkinsonism[tiab] OR parkinson[tiab] OR parkinson disease[tiab] OR parkinsons disease[tiab] OR parkinson's disease[tiab] OR idiopathic parkinson disease[tiab] OR idiopathic parkinsons disease[tiab] OR idiopathic parkinson's disease[tiab]

Block 5

"cerebrovascular disorders"[Mesh] OR "brain ischemia"[Mesh] OR "brain infarction"[Mesh] OR "intracranial hemorrhages"[Mesh] OR "stroke"[Mesh] OR stroke[tiab] OR cerebral[tiab] OR apoplexy[tiab] OR cerebral apoplexy[tiab] OR cerebrovascular apoplexy[tiab] OR CVA[tiab] OR cerebrovascular accident[tiab] OR vascular accident[tiab] OR ((cerebral[tiab] OR cerebellar[tiab] OR brain[tiab] OR brainstem[tiab]) AND (infarct*[tiab] OR ischemi*[tiab] OR ischaemi*[tiab] OR embol*[tiab])) OR ((cerebral[tiab] OR brain[tiab] OR subarachnoid[tiab]) AND (hemorrhage[tiab] OR hemorrhage[tiab] OR haematoma[tiab] OR hematoma[tiab] OR bleeding[tiab])) OR hemiplegi*[tiab] OR hemipar*[tiab] OR pares*[tiab]

Strategy

Block 1 AND Block 2 AND (Block 3 OR Block 4 OR Block 5)

EMBASE searched through Ovid

Block 1

exp psychometry/ OR exp outcome assessment/ OR exp reliability/ OR exp cronbach alpha coefficient/ OR exp internal consistency/ OR exp interrater reliability/ OR exp intrarater reliability/ OR exp item total correlation/ OR exp kuder richardson coefficient/ OR exp split half correlation/ OR exp test retest reliability/ OR exp validity/ OR exp concurrent validity/ OR exp construct validity/ OR exp content validity/ OR exp criterion related validity/ OR exp discriminant validity/ OR exp face validity/ OR exp multitrait multimethod/ OR exp observer variation/ OR exp health survey/ OR exp reproducibility/ OR exp discriminant analysis/ OR exp rating scale/ OR

psychometr$.ti,ab. OR clinimetr$.ti,ab. OR clinometr$.ti,ab. OR outcome assessment.ti,ab. OR outcome measure$.ti,ab. OR observer variation.ti,ab. OR reproducib$.ti,ab. OR reliab$.ti,ab. OR unreliab$.ti,ab. OR valid$.ti,ab. OR coefficient.ti,ab. OR homogeneity.ti,ab. OR homogeneous.ti,ab. OR "internal consistency".ti,ab. OR (cronbach$.ti,ab. AND (alpha.ti,ab. OR alphas.ti,ab.)) OR (item.ti,ab. AND (correlation$.ti,ab. OR selection$.ti,ab. OR reduction$.ti,ab.)) OR agreement.ti,ab. OR precision.ti,ab. OR imprecision.ti,ab. OR "precise values".ti,ab. OR test retest.ti,ab. OR (test.ti,ab. AND retest.ti,ab.) OR (reliab$.ti,ab. AND (test.ti,ab. OR retest.ti,ab.)) OR stability.ti,ab. OR interrater.ti,ab. OR inter-rater.ti,ab. OR intrarater.ti,ab. OR intra-rater.ti,ab. OR intertester.ti,ab. OR inter-tester.ti,ab. OR intratester.ti,ab. OR intra-tester.ti,ab. OR interobserver.ti,ab. OR inter-observer.ti,ab. OR intraobserver.ti,ab. OR intraobserver.ti,ab. OR intertechnician.ti,ab. OR inter-technician.ti,ab. OR intratechnician.ti,ab. OR intra-technician.ti,ab. OR interexaminer.ti,ab. OR inter-examiner.ti,ab. OR intraexaminer.ti,ab. OR intra-examiner.ti,ab. OR interassay.ti,ab. OR inter-assay.ti,ab. OR intraassay.ti,ab. OR intra-assay.ti,ab. OR interindividual.ti,ab. OR inter-individual.ti,ab. OR intraindividual.ti,ab. OR intra-individual.ti,ab. OR interparticipant.ti,ab. OR inter-participant.ti,ab. OR intraparticipant.ti,ab. OR

intra-participant.ti,ab. OR kappa.ti,ab. OR kappas.ti,ab. OR kappas.ti,ab. OR repeatab$.ti,ab. OR ((replicab$.ti,ab. OR repeated.ti,ab.) AND (measure.ti,ab. OR measures.ti,ab. OR findings.ti,ab. OR result.ti,ab. OR results.ti,ab. OR test.ti,ab. OR tests.ti,ab.)) OR generaliza$.ti,ab. OR generalisa$.ti,ab. OR concordance.ti,ab. OR (intraclass.ti,ab. AND correlation$.ti,ab.) OR discriminative.ti,ab. OR "known group".ti,ab. OR factor analysis.ti,ab. OR factor analyses.ti,ab. OR dimension$.ti,ab. OR subscale$.ti,ab. OR (multitrait.ti,ab. AND scaling.ti,ab. AND (analysis.ti,ab. OR analyses.ti,ab.)) OR item discriminant.ti,ab. OR interscale correlation$.ti,ab. OR error.ti,ab. OR errors.ti,ab. OR "individual variability".ti,ab. OR (variability.ti,ab. AND (analysis.ti,ab. OR values.ti,ab.)) OR (uncertainty.ti,ab. AND (measurement.ti,ab. OR measuring.ti,ab.)) OR "standard error of measurement".ti,ab. OR sensitiv$.ti,ab. OR responsive$.ti,ab. OR ((minimal.ti,ab. OR minimally.ti,ab. OR clinical.ti,ab. OR clinically.ti,ab.) AND (important.ti,ab. OR significant.ti,ab. OR detectable.ti,ab.) AND (change.ti,ab. OR difference.ti,ab.)) OR (small*.ti,ab. AND (real.ti,ab. OR detectable.ti,ab.) AND (change.ti,ab. OR difference.ti,ab.)) OR meaningful change.ti,ab. OR "ceiling effect".ti,ab. OR "floor effect".ti,ab. OR "item response model".ti,ab. OR IRT.ti,ab. OR rasch.ti,ab. OR "differential item functioning".ti,ab. OR DIF.ti,ab. OR "computer adaptive testing".ti,ab. OR "item bank".ti,ab. OR "cross-cultural equivalence".ti,ab.

Block 2

exp fatigue/ OR exp chronic fatigue syndrome/ OR fatigue.ti,ab. OR lassitude.ti,ab. OR tired$.ti,ab. OR exhaust$.ti,ab. OR weariness.ti,ab. OR weary.ti,ab.

Block 3

exp multiple sclerosis/ OR exp demyelinating disease/ OR multiple sclerosis.ti,ab. OR demyelinating diseas$.ti,ab. OR myelitis transverse.ti,ab. OR optic neuritis.ti,ab. OR neuromyelitis optica.ti,ab.

Block 4

exp parkinson disease/ OR exp parkinsonism/ OR parkinsonian disorders.ti,ab. OR parkinsonism.ti,ab. OR parkinson.ti,ab. OR parkinson disease.ti,ab. OR parkinsons disease.ti,ab. OR parkinson's disease.ti,ab. OR idiopathic parkinson disease.ti,ab. OR idiopathic parkinsons disease.ti,ab. OR idiopathic parkinson's disease.ti,ab.

Block 5

exp cerebrovascular disease/ OR exp brain ischemia/ OR exp brain infarction/ OR

exp brain hemorrhage/ OR exp stroke/ OR stroke.ti,ab. OR cerebral.ti,ab. OR apoplexy.ti,ab. OR cerebral apoplexy.ti,ab. OR cerebrovascular apoplexy.ti,ab. OR CVA.ti,ab. OR cerebrovascular accident.ti,ab. OR vascular accident.ti,ab. OR ((cerebral.ti,ab. OR cerebellar.ti,ab. OR brain.ti,ab. OR brainstem.ti,ab.) AND (infarct$.ti,ab. OR ischemi$.ti,ab. OR ischaemi$.ti,ab. OR embol$.ti,ab.)) OR ((cerebral.ti,ab. OR brain.ti,ab. OR subarachnoid.ti,ab.) AND (hemorrhage.ti,ab. OR hemorrhage.ti,ab. OR haematoma.ti,ab. OR hematoma.ti,ab. OR bleeding.ti,ab.)) OR hemiplegi$.ti,ab. OR hemipar$.ti,ab. OR pares$.ti,ab.

Strategy

Block 1 AND Block 2 AND (Block 3 OR Block 4 OR Block 5)

PsychINFO searched through Ovid

Block 1

exp psychometrics/ OR exp classical test theory/ OR exp item response theory/ OR exp test validity/ OR exp test reliability/ OR exp error of measurement/ OR exp test construction/ OR exp internal consistency/ OR exp interrater reliability/ OR exp rating scales/ OR exp measurement/ OR psychometr$.ti,ab. OR clinimetr$.ti,ab. OR clinometr$.ti,ab. OR outcome assessment.ti,ab. OR

outcome measure$.ti,ab. OR observer variation.ti,ab. OR reproducib$.ti,ab. OR reliab$.ti,ab. OR unreliab$.ti,ab. OR valid$.ti,ab. OR coefficient.ti,ab. OR homogeneity.ti,ab. OR homogeneous.ti,ab. OR "internal consistency".ti,ab. OR (cronbach$.ti,ab. AND (alpha.ti,ab. OR alphas.ti,ab.)) OR (item.ti,ab. AND (correlation$.ti,ab. OR selection$.ti,ab. OR reduction$.ti,ab.)) OR agreement.ti,ab. OR precision.ti,ab. OR imprecision.ti,ab. OR "precise values".ti,ab. OR

test retest.ti,ab. OR (test.ti,ab. AND retest.ti,ab.) OR (reliab$.ti,ab. AND (test.ti,ab. OR retest.ti,ab.)) OR stability.ti,ab. OR interrater.ti,ab. OR inter-rater.ti,ab. OR intrarater.ti,ab. OR intra-rater.ti,ab. OR intertester.ti,ab. OR inter-tester.ti,ab. OR intratester.ti,ab. OR intra-tester.ti,ab. OR interobserver.ti,ab. OR inter-observer.ti,ab. OR intraobserver.ti,ab. OR intraobserver.ti,ab. OR intertechnician.ti,ab. OR inter-technician.ti,ab. OR intratechnician.ti,ab. OR intra-technician.ti,ab. OR interexaminer.ti,ab. OR inter-examiner.ti,ab. OR intraexaminer.ti,ab. OR intra-examiner.ti,ab. OR interassay.ti,ab. OR inter-assay.ti,ab. OR intraassay.ti,ab. OR intra-assay.ti,ab. OR interindividual.ti,ab. OR inter-individual.ti,ab. OR intraindividual.ti,ab. OR intra-individual.ti,ab. OR interparticipant.ti,ab. OR inter-participant.ti,ab. OR intraparticipant.ti,ab. OR intra-participant.ti,ab. OR kappa.ti,ab. OR kappas.ti,ab. OR kappas.ti,ab. OR repeatab$.ti,ab. OR ((replicab$.ti,ab. OR repeated.ti,ab.) AND (measure.ti,ab. OR measures.ti,ab. OR findings.ti,ab. OR result.ti,ab. OR results.ti,ab. OR test.ti,ab. OR tests.ti,ab.)) OR generaliza$.ti,ab. OR generalisa$.ti,ab. OR concordance.ti,ab. OR (intraclass.ti,ab. AND correlation$.ti,ab.) OR discriminative.ti,ab. OR "known group".ti,ab. OR factor analysis.ti,ab. OR factor analyses.ti,ab. OR dimension$.ti,ab. OR subscale$.ti,ab. OR (multitrait.ti,ab. AND scaling.ti,ab. AND (analysis.ti,ab. OR analyses.ti,ab.)) OR item discriminant.ti,ab. OR interscale correlation$.ti,ab. OR error.ti,ab. OR errors.ti,ab. OR "individual variability".ti,ab. OR (variability.ti,ab. AND (analysis.ti,ab. OR values.ti,ab.)) OR (uncertainty.ti,ab. AND (measurement.ti,ab. OR measuring.ti,ab.)) OR "standard error of measurement".ti,ab. OR sensitiv$.ti,ab. OR responsive$.ti,ab. OR ((minimal.ti,ab. OR minimally.ti,ab. OR clinical.ti,ab. OR clinically.ti,ab.) AND (important.ti,ab. OR significant.ti,ab. OR detectable.ti,ab.) AND (change.ti,ab. OR difference.ti,ab.)) OR (small*.ti,ab. AND (real.ti,ab. OR detectable.ti,ab.) AND (change.ti,ab. OR difference.ti,ab.)) OR meaningful change.ti,ab. OR "ceiling effect".ti,ab. OR "floor effect".ti,ab. OR "item response model".ti,ab. OR IRT.ti,ab. OR rasch.ti,ab. OR "differential item functioning".ti,ab. OR DIF.ti,ab. OR "computer adaptive testing".ti,ab. OR "item bank".ti,ab. OR

"cross-cultural equivalence".ti,ab.

Block 2

exp fatigue/ OR exp chronic fatigue syndrome/ OR fatigue.ti,ab. OR lassitude.ti,ab. OR tired$.ti,ab. OR exhaust$.ti,ab. OR weariness.ti,ab. OR weary.ti,ab.

Block 3

exp multiple sclerosis/ OR multiple sclerosis.ti,ab. OR demyelinating diseas$.ti,ab. OR myelitis transverse.ti,ab. OR optic neuritis.ti,ab. OR neuromyelitis optica.ti,ab.

Block 4

exp parkinsons disease/ OR exp parkinsonism/ OR parkinsonian disorders.ti,ab. OR parkinsonism.ti,ab. OR parkinson.ti,ab. OR parkinson disease.ti,ab. OR parkinsons disease.ti,ab. OR parkinson's disease.ti,ab. OR idiopathic parkinson disease.ti,ab. OR idiopathic parkinsons disease.ti,ab. OR idiopathic parkinson's disease.ti,ab.

Block 5

exp cerebrovascular disorders/ OR exp cerebrovascular accidents/ OR exp cerebral ischemia/ OR exp cerebral hemorrhage/ OR stroke.ti,ab. OR cerebral.ti,ab. OR apoplexy.ti,ab. OR cerebral apoplexy.ti,ab. OR cerebrovascular apoplexy.ti,ab. OR CVA.ti,ab. OR cerebrovascular accident.ti,ab. OR vascular accident.ti,ab. OR ((cerebral.ti,ab. OR cerebellar.ti,ab. OR brain.ti,ab. OR brainstem.ti,ab.) AND (infarct$.ti,ab. OR ischemi$.ti,ab. OR ischaemi$.ti,ab. OR embol$.ti,ab.)) OR ((cerebral.ti,ab. OR brain.ti,ab. OR subarachnoid.ti,ab.) AND (hemorrhage.ti,ab. OR hemorrhage.ti,ab. OR haematoma.ti,ab. OR hematoma.ti,ab. OR bleeding.ti,ab.)) OR hemiplegi$.ti,ab. OR hemipar$.ti,ab. OR pares$.ti,ab.

Strategy

Block 1 AND Block 2 AND (Block 3 OR Block 4 OR Block 5)

CINAHL searched through EBSCO

Block 1

MH"research measurement+" OR MH"outcome assessment" OR MH"health status indicators" OR MH"reproducibility of results" OR MH"outcomes research"

Block 2

MH"fatigue+" OR fatigue OR lassitude OR tired* OR exhaust* OR weariness OR weary

Block 3

MH"multiple sclerosis" OR multiple sclerosis OR demyelinating diseas* OR myelitis transverse OR optic neuritis OR neuromyelitis optica

Block 4

MH"parkinson disease" OR parkinsonian disorders OR parkinsonism OR parkinson OR parkinson disease OR parkinsons disease OR parkinson's disease OR idiopathic parkinson disease OR idiopathic parkinsons disease OR idiopathic parkinson's disease

Block 5

MH"cerebrovascular disorders+" OR stroke OR cerebral OR apoplexy OR cerebral apoplexy OR cerebrovascular apoplexy OR CVA OR cerebrovascular accident OR vascular accident OR ((cerebral OR cerebellar OR brain OR brainstem) AND (infarct* OR ischemi* OR ischaemi* OR embol*)) OR ((cerebral OR brain OR subarachnoid) AND (hemorrhage OR hemorrhage OR haematoma OR hematoma OR bleeding)) OR hemiplegi* OR hemipar* OR pares*

Strategy

Block 1 AND Block 2 AND (Block 3 OR Block 4 OR Block 5)

SPORTdiscus searched through EBSCO

Block 1

DE"health surveys" OR DE"health status indicators" OR reliab* OR valid* OR clinimetr* OR psychometr*

Block 2

DE"chronic fatigue syndrome" OR fatigue OR lassitude OR tired* OR exhaust* OR weariness OR weary

Block 3

DE"multiple sclerosis" OR multiple sclerosis OR demyelinating diseas* OR myelitis transverse OR optic neuritis OR neuromyelitis optica

Block 4

DE"parkinson's disease" OR parkinsonian disorders OR parkinsonism OR parkinson OR parkinson disease OR parkinsons disease OR parkinson's disease OR idiopathic parkinson disease OR idiopathic parkinsons disease OR idiopathic parkinson's disease

Block 5

DE"cerebrovascular disease" OR DE"brain -- hemorrhage" OR

DE"cerebral embolism & thrombosis" OR stroke OR cerebral OR apoplexy OR cerebral apoplexy OR cerebrovascular apoplexy OR CVA OR cerebrovascular accident OR vascular accident OR ((cerebral OR cerebellar OR brain OR brainstem) AND (infarct* OR ischemi* OR ischaemi* OR embol*)) OR ((cerebral OR brain OR subarachnoid) AND (hemorrhage OR hemorrhage OR haematoma OR hematoma OR bleeding)) OR hemiplegi* OR hemipar* OR pares*

Strategy

Block 1 AND Block 2 AND (Block 3 OR Block 4 OR Block 5)
